# Supplementary material for: Milk protects against sarcopenic obesity due to increase in the genus Akkermansia in faeces of db/db mice
Source: PubMed Central journal article supplement (PMC10235896; doi:10.1002/jcsm.13245), 2023-05-02
Supplement: JCSM-14-1395-s002.pdf [file JCSM-14-1395-s002.pdf]

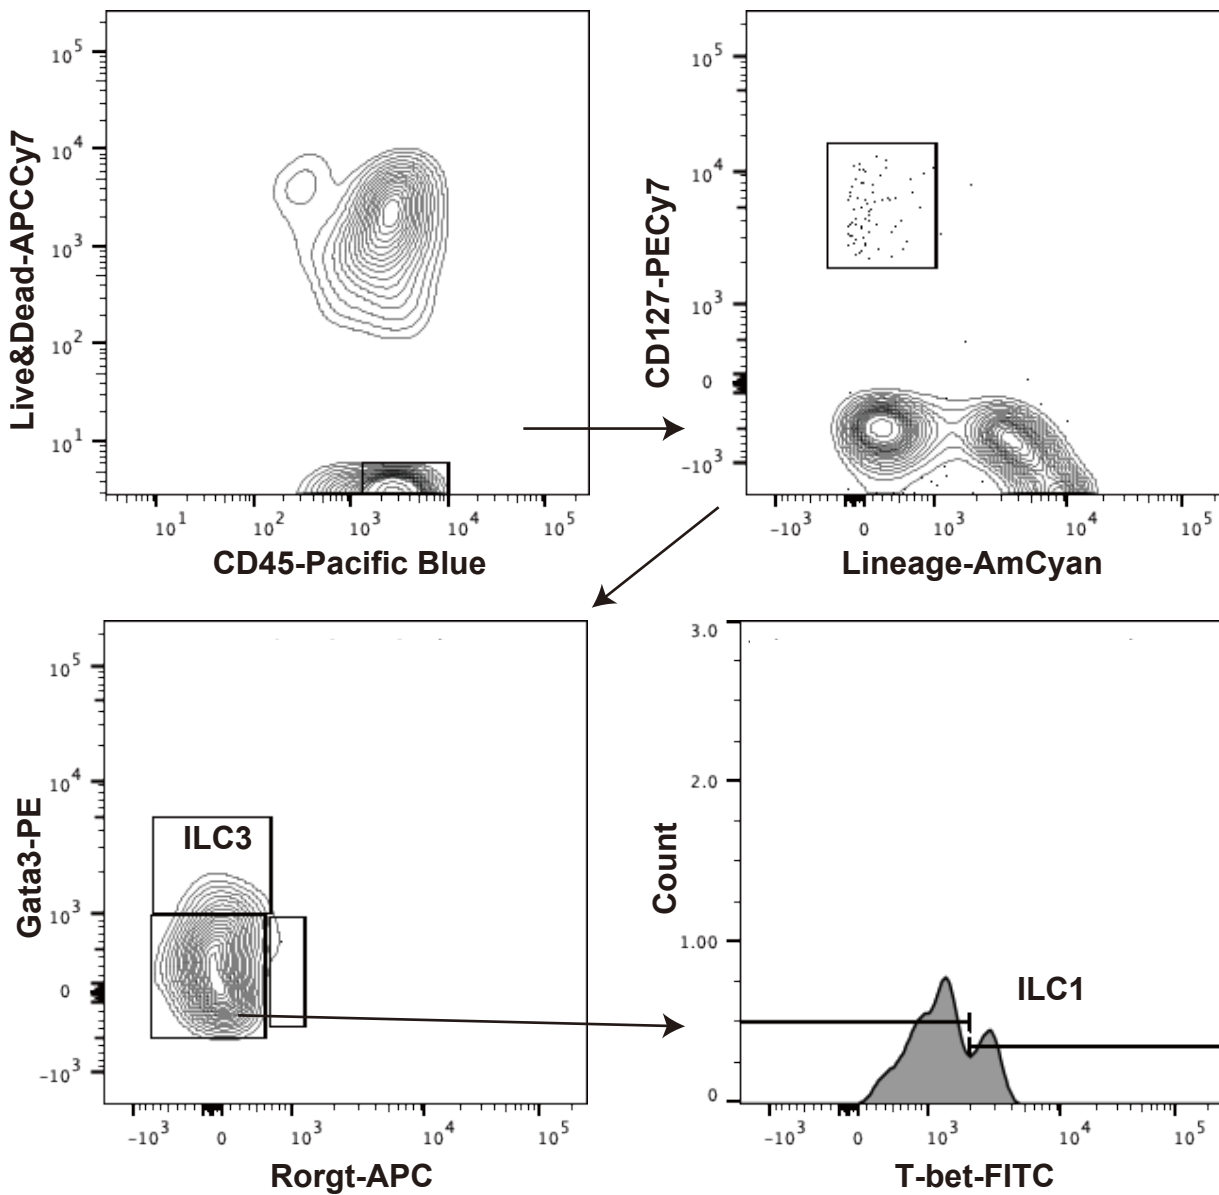

### Supplementary Figure 1. Strategy for innate lymphoid cells (ILCs)

Representative flow cytometry plots of liver CD45<sup>+</sup> Live & Dead<sup>-</sup> Lin<sup>-</sup> CD127<sup>+</sup> RORg<sup>-</sup> GATA-3<sup>-</sup> T-bet<sup>+</sup> ILC1s, CD45<sup>+</sup> Live & Dead<sup>-</sup> Lin<sup>-</sup> CD127<sup>+</sup> RORg<sup>-</sup> GATA-3<sup>+</sup> ILC2s and CD45<sup>+</sup> Live & Dead<sup>-</sup> Lin<sup>-</sup> CD127<sup>+</sup> RORg<sup>+</sup> GATA-3<sup>-</sup> ILC3s in each group at 16-weeks of age.

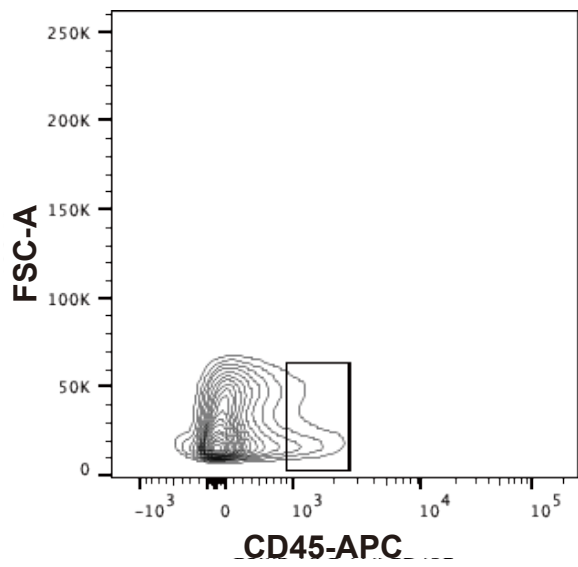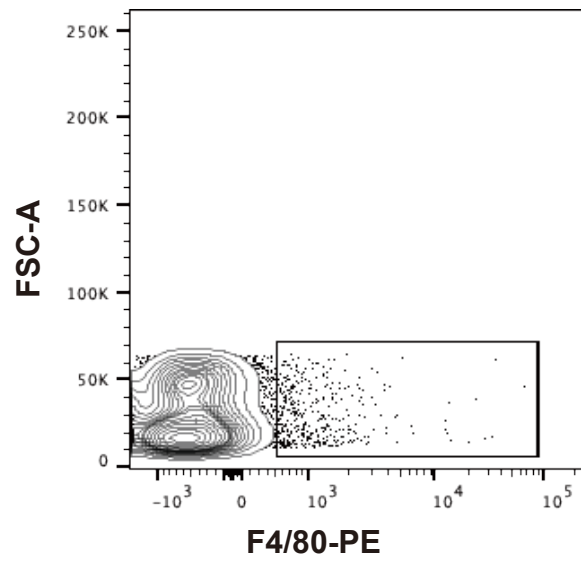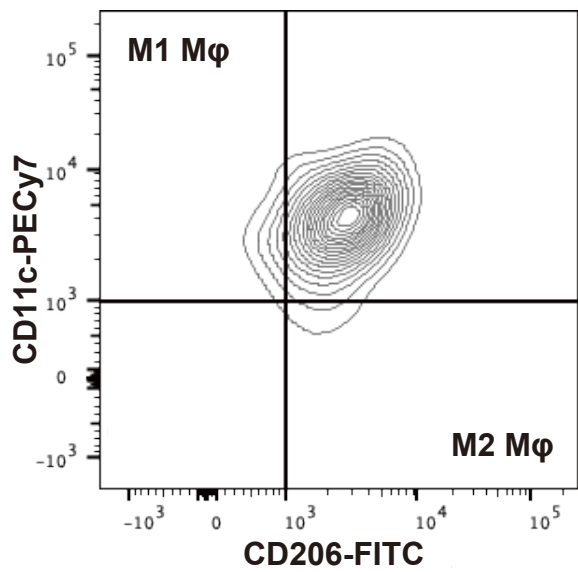

**Supplementary Figure 2. Strategy for macrophages**

Representative flow cytometry plots of liver CD45+ F4/80+ CD206- CD11c+ M1 macrophages and CD45+ F4/80+ CD206+ CD11c- M2 macrophages in each group at 16 weeks of age.
